# Supplementary material for: <em></em><em>Candida albicans </em>Morphology Dependent Host FGF-2 Response as a Potential Therapeutic Target
Source: Preprints.org preprint supplement (doi:10.20944/preprints201902.0025.v1), 2019-02-03
Supplement: Supplementary file 1 [file supplementary]

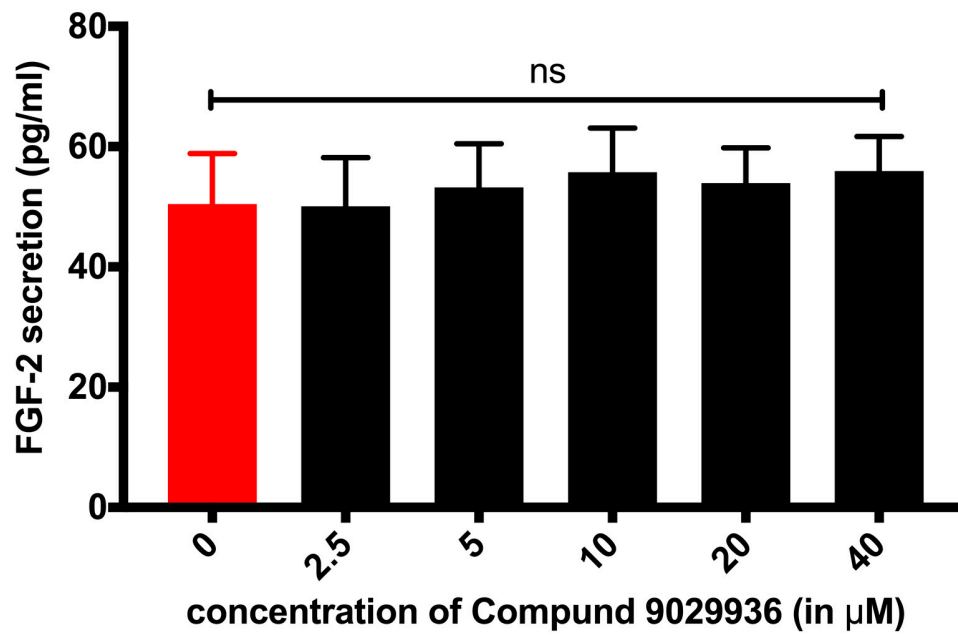

**Figure S1. Compound 9029936 itself does not affect endothelial cell FGF-2 response.** HUVECs were treated with 0 to 40 μM of compound 9029936 for 24 hours and the FGF-2 levels were measured in the supernatants. One-way ANOVA was not significant ( $P = 0.98$ ).

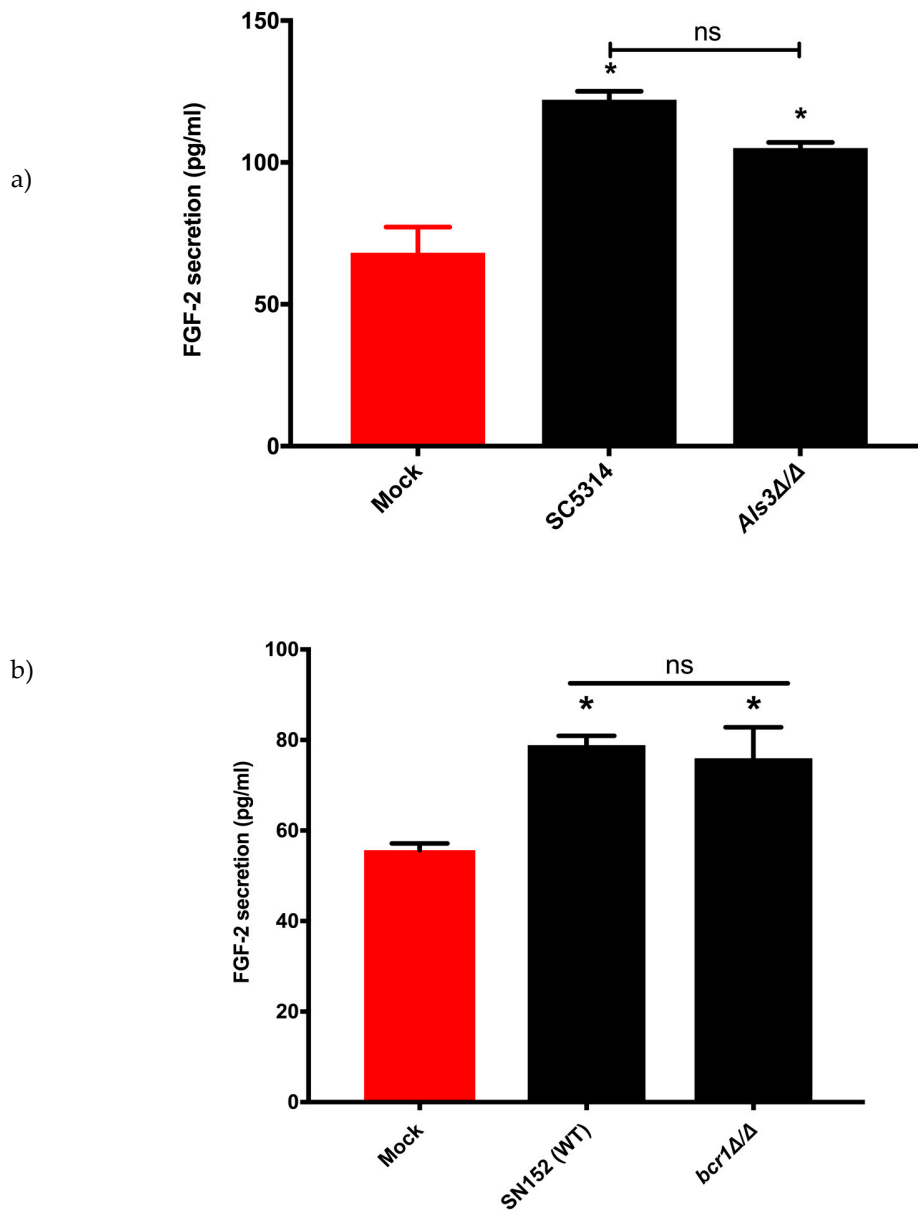

**Figure S2. ALS3 and BCR1-regulated cell wall proteins are not involved in the regulation of host FGF-2 secretion.** a) HUVECs were challenged with either SC5314 or *als3*Δ/Δ *C. albicans* strains for 24 hours. FGF-2 levels were measured using ELISA. While one-way ANOVA ( $P = 0.0002$ ) and Dunnett's multiple comparison demonstrated a statistically significant difference ( $P < 0.05$ ) between the mock and SC5314/*als3*Δ/Δ infected groups, (as indicated by \*), there was no significant difference between the SC5314 and *als3*Δ/Δ ( $P = 0.134$ ) groups. b) HUVECs were challenged with either the *bcr1*Δ/Δ mutant or SN152 parental strain for 24 hours. FGF-2 levels were measured using ELISA. Again, one-way ANOVA ( $P = 0.015$ ) and Dunnett's multiple comparison ( $P < 0.05$ ) only showed a statistically significant difference between mock and *C. albicans* challenged groups, (indicated by \*). There was no significant difference between the SN152 parental strain and *bcr1*Δ/Δ mutant challenged groups ( $P = 0.134$ ).

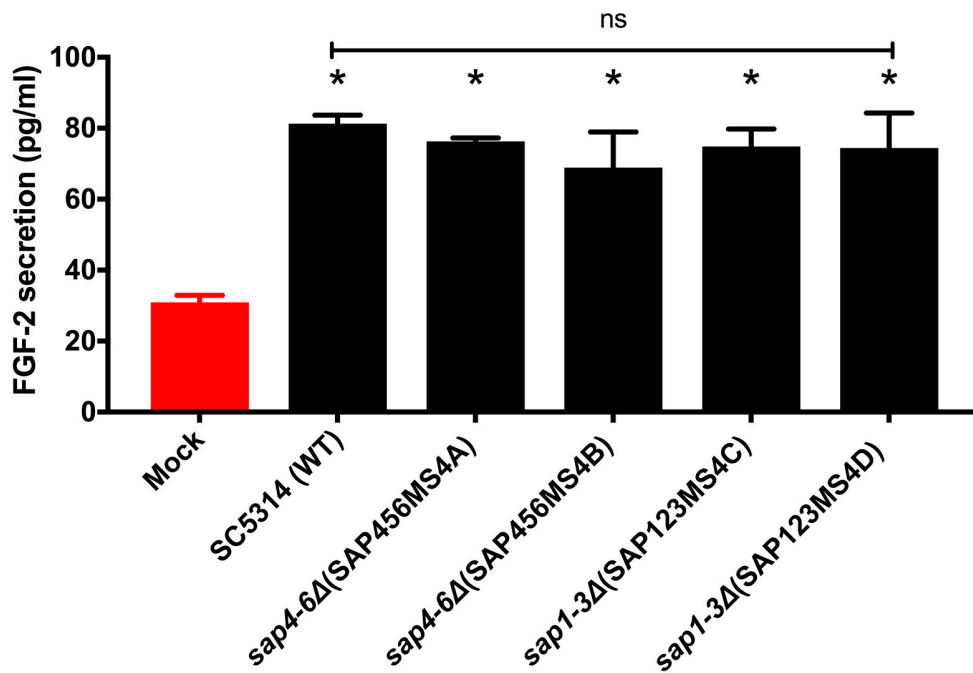

**Figure S3. Sap proteins are not linked with host endothelial FGF-2 response.** HUVECs were challenged with either SC5314 (WT) or the *sap1-3Δ/Δ* or *sap4-6Δ/Δ* mutant strains. Both one-way ANOVA ( $P = 0.0008$ ) and Dunnett's multiple comparison ( $P < 0.05$ ) demonstrated a statistically significant difference between the mock and all *C. albicans* infected groups, as indicated by (\*). However, no significant difference was observed between SC5314 wild-type and *sap1-3Δ/sap4-6Δ* mutant infected groups ( $P > 0.05$ ).

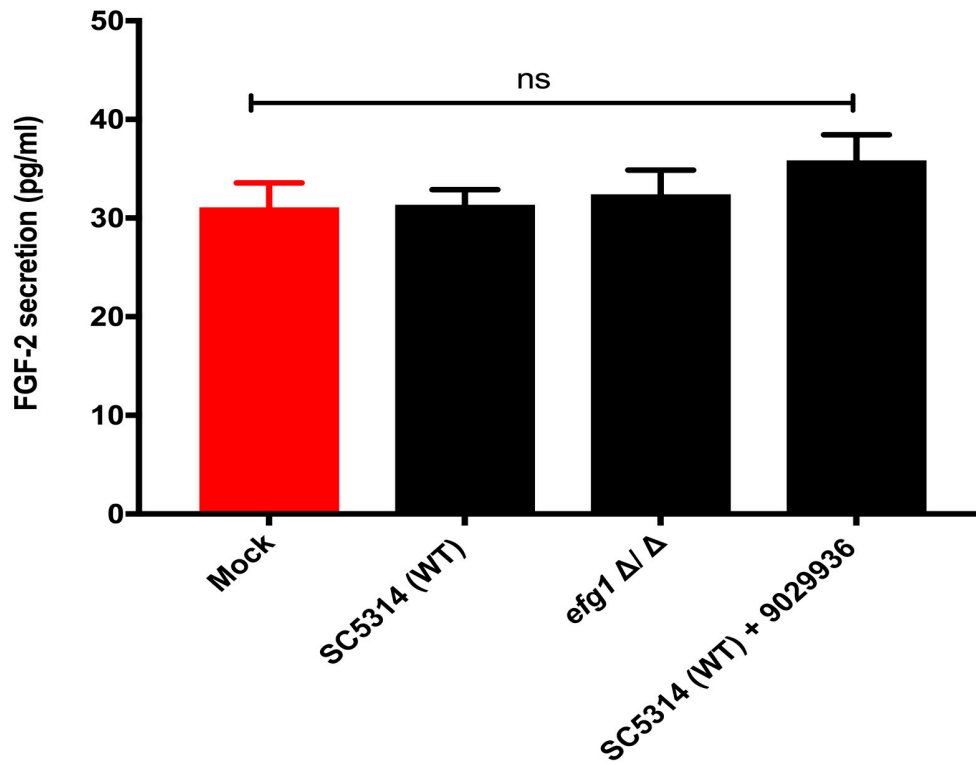

**Figure S4. *C. albicans* spent medium is not sufficient to increase host FGF-2 response.** *C. albicans* SC5314, *efg1*Δ/Δ or SC5314 + Compound 9029936 (10 μM) were grown in EBM at 37°C for 24 hours. The spent medium was filtered and added to HUVEC cultures for 24 hours. One-way ANOVA displayed no statistically significant difference in FGF-2 secretion between the groups (P = 0.287).
